# Supplementary material for: Enhancement of electroluminescence in zirconium poly carboxylic acid-based light emitting diodes by bathophenanthroline ligand
Source: Royal Society of Chemistry journal article supplement (doi:10.1039/c3cp51141c), 2013-01-01

## **Supplementary information**

### **Enhancement of Electroluminescence in Zirconium Poly Carboxylic Acid-Based Light Emitting Diodes by Bathophenanthroline Ligand**

**Hashem Shahroosvand<sup>a\*</sup>, Fahimeh Nasouti<sup>a</sup>, Ahmad Sosarai<sup>a</sup>, Ezeddin Mohajerani<sup>b</sup>, Amir Khabbazi<sup>b</sup>**

**S1:**

Table 1: FT-IR and UV-Vis data

a:(cm<sup>-1</sup>)

b: (nm)

| IR <sup>a</sup> | IR <sup>a</sup>        |                     |             |                    |                  |                   | UV-vis <sup>b</sup>       |                       |
|-----------------|------------------------|---------------------|-------------|--------------------|------------------|-------------------|---------------------------|-----------------------|
|                 | $\nu_{as}(\text{COO})$ | $\nu_s(\text{COO})$ | $\Delta\nu$ | $\nu(\text{COOH})$ | $\nu(\text{OH})$ | $\nu(\text{C-N})$ | $\Pi \rightarrow \Pi^*$   | $n \rightarrow \Pi^*$ |
| 1               | 1554                   | 1364                | 190         |                    |                  |                   | 215 ,255                  | 296                   |
| 2               | 1545                   | 1364                | 181         |                    |                  |                   | 215 , 256                 | 296                   |
| 3               | 1505                   | 1405                | 100         | 1711               |                  |                   | 215 , 255                 | 297                   |
| 4               | 1503                   | 1438                | 65          | 1724               |                  |                   | 215 , 255                 | 295                   |
| 5               | 1551                   | 1359                | 192         |                    |                  |                   | 215 , 255                 | 297                   |
| 6               | 1551                   | 1356                | 195         |                    |                  |                   | 214 , 256                 | 296                   |
|                 | 1476                   | 1317                | 159         |                    |                  |                   |                           |                       |
| 7               | 1611                   | 1446                | 165         | 1706               |                  |                   | 214 , 255                 | 295                   |
|                 | 1509                   | 1412                | 97          |                    |                  |                   |                           |                       |
| 8               | 1599                   | 1378                | 221         |                    |                  |                   | 207, 255                  | 291                   |
|                 | 1481                   | 1416                | 65          |                    |                  |                   |                           |                       |
| 9               | 1577                   | 1381                | 196         |                    |                  |                   | 208, 255                  | 291                   |
|                 | 1482                   | 1422                | 60          |                    |                  |                   |                           |                       |
| 10              | 1558                   | 1374                | 184         | —                  | 3427             | —                 | 207 , 220 , 238,308 , 332 |                       |
|                 | 1487                   | 1410                | 77          |                    |                  |                   | 272                       |                       |
| 11              | 1552                   | 1378                | 174         | —                  | 3436             | 2061              | 206 , 219 , 238,308 , 332 |                       |
|                 | 1486                   | 1410                | 76          |                    |                  |                   | 272                       |                       |
| 12              | 1552                   | 1378                | 174         | —                  | 3434             | —                 | 205 , 220 , 238,308 , 331 |                       |
|                 | 1486                   | 1410                | 76          |                    |                  |                   | 274                       |                       |
| 13              | 1552                   | 1377                | 175         | 1722               | 3427             | —                 | 205 , 220 , 238,309 , 333 |                       |
|                 | 1485                   | 1410                | 75          |                    |                  |                   | 272                       |                       |
| 14              | 1552                   | 1378                | 174         | —                  | 3411             | —                 | 207 , 220 , 238,308 , 333 |                       |
|                 | 1484                   | 1410                | 74          |                    |                  |                   | 272                       |                       |
| 15              | 1552                   | 1377                | 175         | 1725               | 3444             | —                 | 204 , 220 , 238,309 , 332 |                       |
|                 | 1486                   | 1411                | 75          |                    |                  |                   | 273                       |                       |
| 16              | 1551                   | 1377                | 175         | —                  | 3402             | —                 | 205 , 220 , 238,308 , 331 |                       |
|                 | 1484                   | 1410                | 75          |                    |                  |                   | 272                       |                       |
| 17              | 1552                   | 1378                | 174         | 1719               | 3445             | —                 | 204 , 220 , 238,309 , 330 |                       |
|                 | 1486                   | 1411                | 75          |                    |                  |                   | 273                       |                       |
| 18              | 1551                   | 1378                | 173         | —                  | 3507             | —                 | 203 , 220 , 239,308 , 334 |                       |
|                 | 1484                   | 1409                | 74          |                    |                  |                   | 272                       |                       |
| 19              | 1552                   | 1378                | 174         | 1725               | 3434             | —                 | 204 , 220 , 238,310 , 331 |                       |
|                 | 1483                   | 1410                | 73          |                    |                  |                   | 272                       |                       |
| 20              | 1551                   | 1381                | 170         | —                  | 3462             | —                 | 203 , 220 , 238,309 , 334 |                       |
|                 | 1484                   | 1410                | 74          |                    |                  |                   | 273                       |                       |
| 21              | 1551                   | 1378                | 173         | 1725               | 3436             | —                 | 206 , 220 , 238,309 , 333 |                       |
|                 | 1484                   | 1410                | 74          |                    |                  |                   | 270                       |                       |

S2:NMR Spectra of Zr complexes recorded in DMSO solven at room temperature.

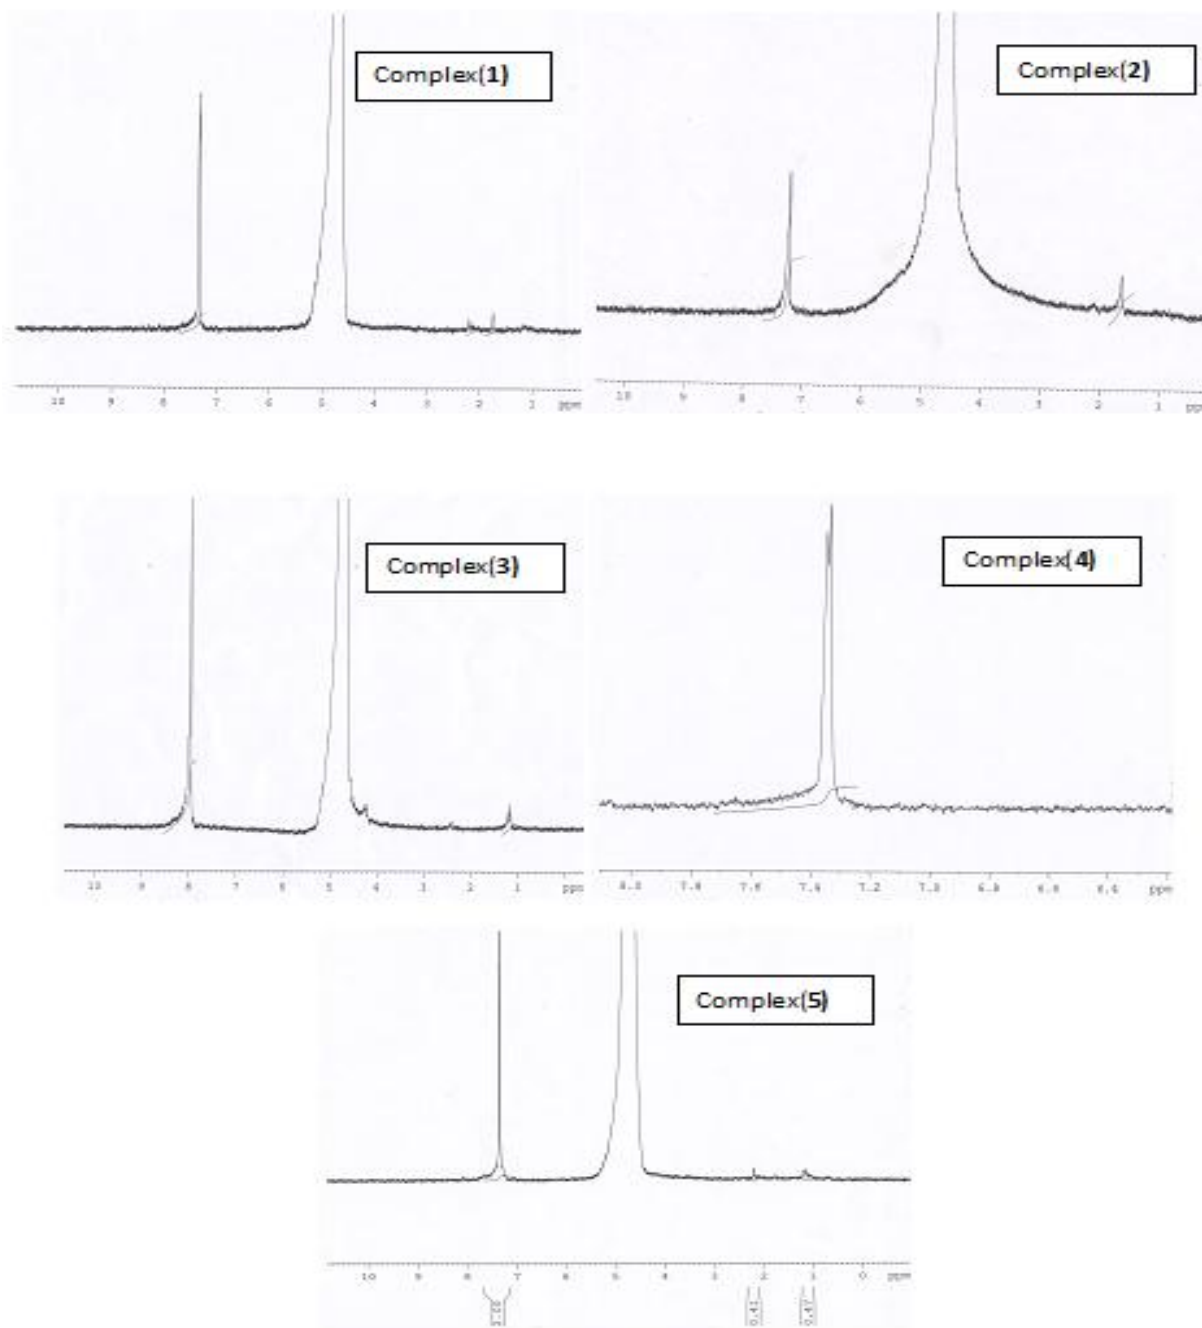

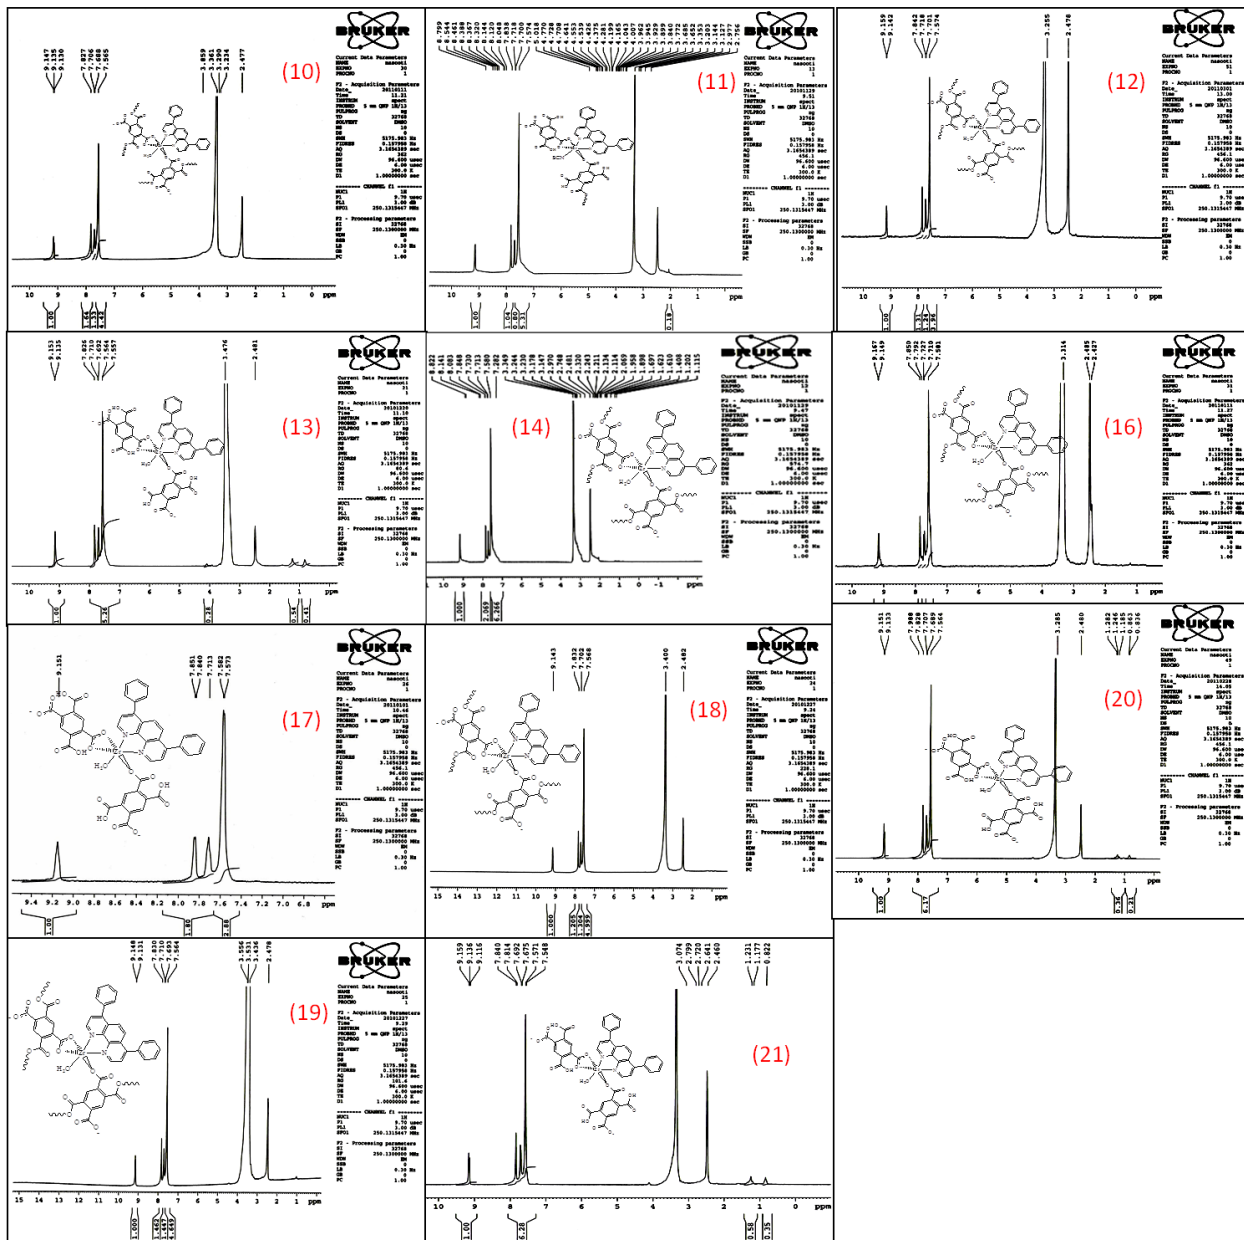

S3:

(-----) HOMO-LUMO level arrangement from DFT calculation and (-----) HOMO-LUMO level arrangement from Cyclic Voltammetry analyses.

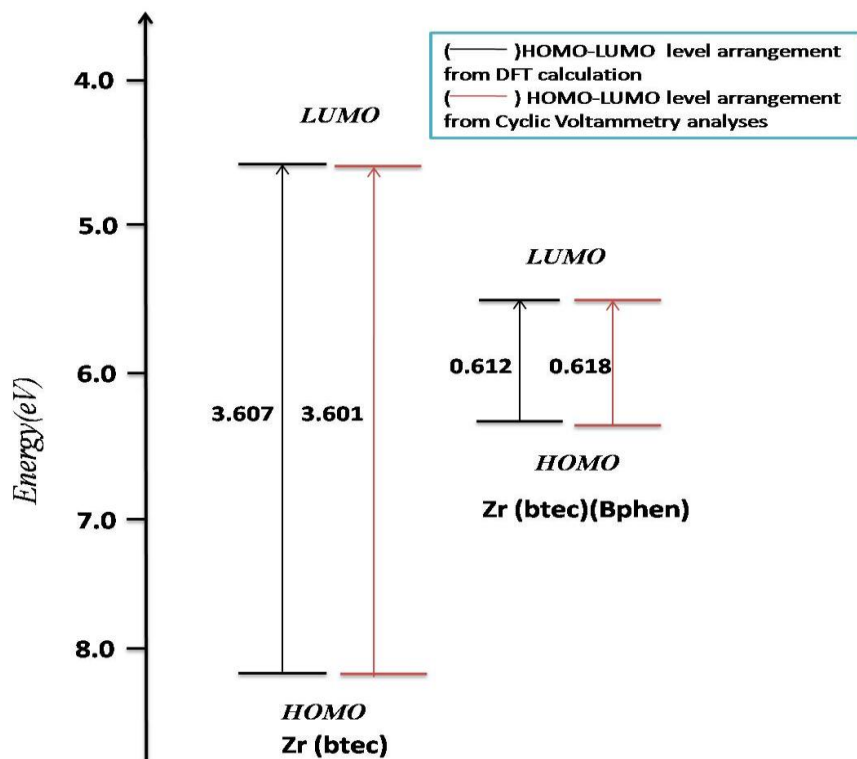



S5:

HOMO-LUMO configuration for ligand to metal charge transfer (LMCT) in Zr(btec)(Bphen).

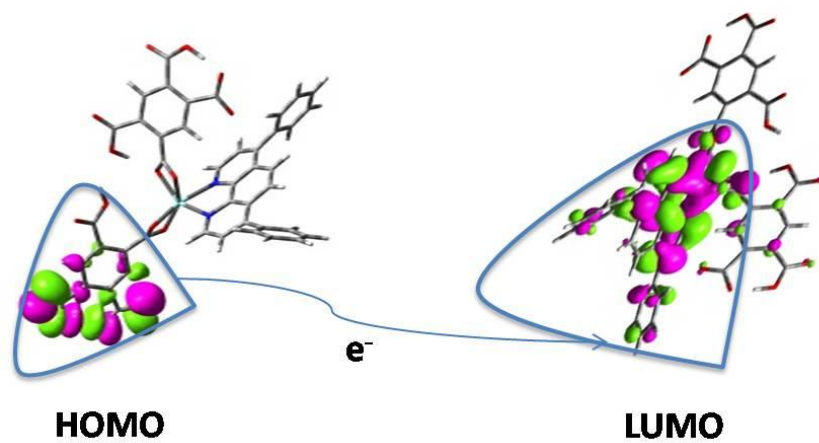

Supplement: c3cp51141c.pdf [file c3cp51141c.pdf]
